# Supplementary material
Source: MDPI journal article supplement (https://www.mdpi.com/2304-6767/9/5/47)
Supplement: s1 [file s1]

| Characteristic              | Response        | n (%)       |
|-----------------------------|-----------------|-------------|
| <i>Gender</i>               | Male            | 35 (43.75%) |
|                             | Female          | 45 (56.25%) |
| <i>Age</i>                  | 25-39           | 46 (57.50%) |
|                             | 40-60           | 34 (42.50%) |
| <i>Job</i>                  | Orthodontist    | 40 (50%)    |
|                             | Dentist         | 40 (50%)    |
| <i>Country of residence</i> | Italy           | 80 (100%)   |
|                             | Foreign country | 0 (0%)      |
| <i>Level of education</i>   | Bachelor Degree | 26 (32.50%) |
|                             | Post-graduate   | 46 (57.50%) |
|                             | PhD             | 8 (10%)     |

**Table S1.** Sociodemographic data of the doctors participating in the survey.

| Characteristic              | Response         | n (%)       |
|-----------------------------|------------------|-------------|
| <i>Gender</i>               | Male             | 33 (41.25%) |
|                             | Female           | 47 (58.75%) |
| <i>Age</i>                  | 12-14            | 22 (27.50%) |
|                             | 15-18            | 21 (26.25%) |
|                             | 19-30            | 20 (25%)    |
|                             | 31-40            | 11 (13.75%) |
|                             | 41-50            | 6 (7.50%)   |
|                             | Student          | 45 (56.25%) |
|                             | Lawyer           | 3 (3.75%)   |
| <i>Job</i>                  | Teacher          | 10 (12.50%) |
|                             | Medical field    | 8 (10%)     |
|                             | Others           | 14 (17.50%) |
| <i>Country of residence</i> | Italy            | 80 (100%)   |
|                             | Foreign country  | 0 (0%)      |
| <i>Level of education</i>   | Secondary school | 47 (58.75%) |
|                             | High school      | 12 (15%)    |
|                             | Bachelor Degree  | 21 (26.25%) |

**Table S2.** Sociodemographic data of the patients participating in the survey.

| Characteristic                  | Response | n (%)       |
|---------------------------------|----------|-------------|
| <i>Do you own a smartphone?</i> | Yes      | 79 (98.75%) |
|                                 | No       | 1 (1.25%)   |
| <i>Are you online daily?</i>    | Yes      | 79 (98.75%) |

|                                                                                 |                          |             |
|---------------------------------------------------------------------------------|--------------------------|-------------|
|                                                                                 | No                       | 1 (1.25%)   |
| <i>Are you aware of the possibility to use a smartphone for telemonitoring?</i> | Yes                      | 43 (53.75%) |
|                                                                                 | No                       | 37 (46.25%) |
| <i>Do you positively judge telemonitoring?</i>                                  | Yes                      | 80 (100%)   |
|                                                                                 | No                       | 0 (0%)      |
|                                                                                 | Yes                      | 23 (28.75%) |
|                                                                                 | 0-25%                    | 15 (18.75%) |
| <i>Have you ever used a smartphone-based monitoring system?</i>                 | 25-50%                   | 6 (7.50%)   |
|                                                                                 | 50-75%                   | 2 (2.50%)   |
|                                                                                 | 75-100%                  | 0           |
|                                                                                 | No                       | 57 (71.25%) |
|                                                                                 | Emergencies              | 16 (20%)    |
| <i>If yes, for which purpose?</i>                                               | Hygiene collaboration    | 1 (1.25%)   |
|                                                                                 | wearing external devices | 7 (8.75%)   |
|                                                                                 | treatment progress       | 3 (3.75%)   |
| <i>Do you think telemonitoring can reduce the number of in-office visit?</i>    | Yes                      | 80 (100%)   |
|                                                                                 | No                       | 0 (0%)      |
| <i>Do you consider telemonitoring indicative of high-tech and high-quality?</i> | Yes                      | 77 (96.25%) |
|                                                                                 | No                       | 3 (3.75%)   |
| <i>Do you consider useful to periodically measure teeth movements?</i>          | Yes                      | 79 (96.50%) |
|                                                                                 | No                       | 1 (2.50%)   |
| <i>Would you be willing to examine patients pictures every 2 weeks?</i>         | Yes                      | 46 (57.50%) |
|                                                                                 | No                       | 34 (42.50%) |
| <i>Would you be willing to examine patients pictures every week?</i>            | Yes                      | 14 (17.50%) |
|                                                                                 | No                       | 66 (82.50%) |
| <i>Are you concerned about the economic impact on your financial budget?</i>    | Yes                      | 55 (68.75%) |
|                                                                                 | No                       | 25 (31.25%) |

Table S3. Questionnaire for doctors.

| Question                                                                            | Response | N           |
|-------------------------------------------------------------------------------------|----------|-------------|
| <i>Do you own a smartphone?</i>                                                     | Yes      | 80 (100%)   |
|                                                                                     | No       | 0 (0%)      |
| <i>Are you online daily?</i>                                                        | Yes      | 77 (96.25%) |
|                                                                                     | No       | 3 (3.75%)   |
| <i>Are you aware of the possibility to use a smartphone for telemonitoring?</i>     | Yes      | 33 (41.25%) |
|                                                                                     | No       | 47 (58.75%) |
| <i>Do you positively judge telemonitoring?</i>                                      | Yes      | 75 (93.75%) |
|                                                                                     | No       | 5 (6.25%)   |
| <i>Are you interested in reducing the number of in-office visits?</i>               | Yes      | 65 (81.25%) |
|                                                                                     | No       | 15 (18.75%) |
| <i>Do you consider the use of telemonitoring indicative of high-tech treatment?</i> | Yes      | 65 (81.25%) |

|                                                                                                       |     |             |
|-------------------------------------------------------------------------------------------------------|-----|-------------|
|                                                                                                       | No  | 15 (18.75%) |
|                                                                                                       | Yes | 65 (81.25%) |
| <i>Do you consider the use of telemonitoring indicative of high-quality treatment?</i>                | No  | 15 (18.75%) |
|                                                                                                       | Yes | 68 (85%)    |
| <i>Would you be willing to take pictures of your teeth every 2 weeks?</i>                             | No  | 12 (15%)    |
|                                                                                                       | Yes | 22 (27.50%) |
| <i>Would you be willing to take pictures of your teeth every week?</i>                                | No  | 58 (72.50%) |
|                                                                                                       | Yes | 28 (35%)    |
| <i>Are you willing to pay an additional fee to use a telemonitoring system during your treatment?</i> | No  | 52 (65%)    |

**Table S4.** Questionnaire for patients.

| Patients           | Male | Female |
|--------------------|------|--------|
| <b>Yes</b>         | 31   | 44     |
| <b>No</b>          | 2    | 3      |
| <i>p-value</i> .73 |      |        |

**Table S5.** Association between gender and attitude toward telemonitoring among the patients.

| Patients           | <18 | >18 |
|--------------------|-----|-----|
| <b>Yes</b>         | 41  | 35  |
| <b>No</b>          | 2   | 2   |
| <i>p-value</i> .81 |     |     |

**Table S6.** Association between age and attitude toward telemonitoring among the patients.

| Question                                                                     | Response | Patients |             | Doctors     |             | Dentists | Orthodontists |
|------------------------------------------------------------------------------|----------|----------|-------------|-------------|-------------|----------|---------------|
|                                                                              |          | males    | females     | males       | females     |          |               |
| <i>Are you concerned about the economic impact on your financial budget?</i> | Yes      | 22 (67%) | 33 (72.22%) | 18 (51.40%) | 29 (64.40%) | 24 (60%) | 24 (60%)      |
|                                                                              | No       | 11 (33%) | 14 (29.78%) | 17 (48.60%) | 16 (35.60%) | 16 (40%) | 16 (40%)      |

**Table S7.** Association between gender and concerns about an additional fee.

| Patients           | Male | Female |
|--------------------|------|--------|
| <b>Yes</b>         | 22   | 33     |
| <b>No</b>          | 11   | 14     |
| <i>p-value</i> .73 |      |        |

**Table S8.** Chi-square test investigating the correlation between gender and concerns about an additional fee among the patients.

| Doctors            | Male | Female |
|--------------------|------|--------|
| Yes                | 18   | 29     |
| No                 | 17   | 16     |
| <i>p-value</i> .24 |      |        |

**Table S9.** Chi-square test investigating the correlation between gender and concerns about an additional fee among the doctors.

| Question                                                                           | Response | Patients       |                | Dentists        |                 |
|------------------------------------------------------------------------------------|----------|----------------|----------------|-----------------|-----------------|
|                                                                                    |          | < 18 years old | > 18 years old | 25-39 years old | 40-60 years old |
| <i>Would you be willing to take / analyse pictures of the teeth every 2 weeks?</i> | Yes      | 40 (93%)       | 30 (81%)       | 27 (58.70%)     | 18 (52.90%)     |
|                                                                                    | No       | 3 (7%)         | 7 (19%)        | 19 (41.30%)     | 16 (47.10%)     |
| <i>Would you be willing to take / analyse pictures of the teeth every week?</i>    | Yes      | 25 (58%)       | 13 (35%)       | 6 (22.20%)      | 1 (7.70%)       |
|                                                                                    | No       | 18 (42%)       | 24 (65%)       | 21 (77.80%)     | 12 (92.30%)     |

**Table S10.** Association between age and availability to take / examine pictures bi-weekly or weekly.
